# Supplementary material
Source: PubMed Central journal article supplement (PMC2890813)
Supplement: 1005931107_pnas.201005931SI.pdf [file 1005931107_pnas.201005931SI.pdf]

# Supporting Information

Xie et al. 10.1073/pnas.1005931107

## SI Results

Several factors may affect the accuracy of maximum parsimony of recombination (MPR) inference: the number of single-nucleotide polymorphisms (SNPs) processed each time (window size), the density of putative SNPs (the distance between SNP sites), the number of recombinant inbred lines (RILs), and the maximum step size of the heuristic perturbation. We conducted Monte Carlo simulations to assess the effects of these factors using the 11,948 high-quality SNPs that were identified in both multiplexed sequencing of RILs and parental deep sequencing. The results of 10,000 random samplings are shown in Figs. S3 and S4. As expected, when the window size was fixed at 50 SNPs, the number of recombination events in a window increases with the length of the genomic region. This is the case for using data from both deep sequencing and MPR-inferred genotypes of the parents (Fig. S3A and B). When SNP density is greater than 105 kb/SNP and the maximum step size is greater than 1, more than 99.9% of the deduced parental genotype calls are identical to the sequencing results (Fig. S3C), and more than 95% of the total number of recombination events calculated using the sequencing results are equal to the predictions (Fig. S3D). The results also showed that consistency would drop quickly when SNP density is lower than 232 kb/SNP, providing a reference for the applicability and the limitation of the MPR method. However, even when the SNP density is very low, >93% of the parental genotype calls could be deduced correctly, which indicates that the MPR method is robust even for species with lower SNP densities or even with lower sequence coverage.

The results showed that influence of window size on inference at high SNP densities is small, and the accuracy of deduced parental genotypes stabilizes when there are 30 SNPs or more per window (Fig. S4A). When SNP density is low, a larger window size leads to lower accuracy. Moreover, a population size of 110 RILs suffices to achieve an accuracy of 99% with SNP density of 49 kb/SNP or higher (Fig. S4B). More lines would be needed with lower SNP density to achieve the same accuracy.

We also evaluated the influence of heterozygosity on parental genotyping by simulations. A subset (denoted as  $N$ ) of the 238 RILs was randomly selected and divided into two groups. Individuals in the two groups were mated pairwise in silico, resulting in  $N/2$   $F_2$ -like lines, similar to the immortalized  $F_2$  design (1, 2). Such a mating process was repeated twice, resulting in  $N$   $F_2$ -like lines. Combined with the unmated lines ( $238 - N$ ), we obtained a mixed population of 238 lines. A series of different  $N$ s was selected, resulting in populations with expected heterozygosity ranging from 0 to 50%. The simulated results of MPR analyses of these populations showed that over 98% of the parental genotypes can be inferred correctly even when heterozygosity is 50% (Fig. S5), indicating the robustness of the method. The results also showed that the inference of the MPR method is more sensitive to heterozygosity when SNP density is low.

## SI Materials and Methods

**Identifying High-Quality SNPs Using Parental Sequences.** The “pileup” text format files of the two parents were obtained separately using the same process as for RIL sequences. For each parent, a high-quality SNP was identified when satisfying the following criteria: (i) only one nucleotide on this position with a sum of base quality for this nucleotide  $\geq 60$ ; (ii) the nucleotide is supported by at least three reads; (iii) at least one base call of the nucleotide with base quality  $\geq 20$ ; (iv)  $\geq 80\%$  of the base calls on this position agree with the nucleotide; and (v) the consensus nucleotides between parents are different.

**Identifying Inferior SNPs Using Parental Sequences.** To eliminate inferior SNPs due to copy-number variation or incorrect alignment which produces two or more different nucleotides at a site within a parent, we processed the “pileup” text format files of the two parents separately and identified such SNPs using the criteria for identification of potential SNPs using RIL sequences (*Materials and Methods*). SNPs that had two or more different nucleotides at a site within a parent were regarded as inferior SNPs.

1. Hua JP, et al. (2002) Genetic dissection of an elite rice hybrid revealed that heterozygotes are not always advantageous for performance. *Genetics* 162:1885–1895.

2. Hua JP, et al. (2003) Single-locus heterotic effects and dominance by dominance interactions can adequately explain the genetic basis of heterosis in an elite rice hybrid. *Proc Natl Acad Sci USA* 100:2574–2579.

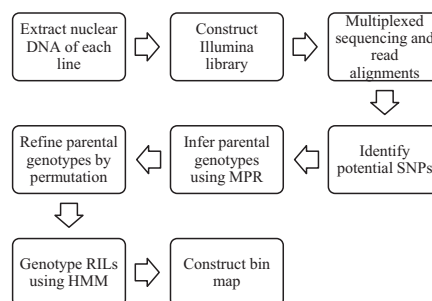

Fig. S1. The workflow of parent-independent genotyping.
